# Supplementary material for: Changes Occurring on the Activity of Salivary Alpha-Amylase Proteoforms in Two Naturalistic Situations Using a Spectrophotometric Assay
Source: MDPI journal article supplement (doi:10.3390/biology10030227), 2021-03-16
Supplement: s1 [file s1]

**Changes occurring on the activity of salivary alpha-amylase proteoforms in two naturalistic situations using a spectrophotometric assay.** María D. Contreras-Aguilar, Sandra V. Mateo, Fernando Tecles, Christophe Hirtz, Damián Escribano, Jose J. Cerón.

|                         | specimen 1              |                 | specimen 2              |                 | specimen 3              |                 | <i>p</i><br>value <sup>1</sup> |
|-------------------------|-------------------------|-----------------|-------------------------|-----------------|-------------------------|-----------------|--------------------------------|
|                         | Activity<br>measurement | NGsAA +<br>GsAA | Activity<br>measurement | NGsAA +<br>GsAA | Activity<br>measurement | NGsAA +<br>GsAA |                                |
| TsAA (IU/mL)            | 143.0                   |                 | 368.5                   |                 | 39.9                    |                 |                                |
| NGsAA (IU/mL)           | 21.7                    |                 | 69.8                    |                 | 6.9                     |                 |                                |
| GsAA (IU/mL)            |                         |                 |                         |                 |                         |                 |                                |
| MMp treatment at 1:12.5 | 49.1                    | 71.0            | 165.2                   | 235.0           | 14.9                    | 21.8            |                                |
| MMp treatment at 1:25   | 66.7                    | 88.5            | 217.0                   | 286.8           | 19.2                    | 26.1            | 0.286                          |
| MMp treatment at 1:50   | 76.5                    | 98.3            | 267.9                   | 337.6           | 26.0                    | 32.9            | 0.060                          |
| MMp treatment at 1:100  | 91.4                    | 113.2           | 285.8                   | 355.6           | 26.8                    | 33.7            | <b>0.027</b>                   |
| MMp treatment at 1:200  | 89.4                    | 111.3           | 300.0                   | 369.8           | 27                      | 33.9            | <b>0.020</b>                   |
