# Supplementary material for: Changes Occurring on the Activity of Salivary Alpha-Amylase Proteoforms in Two Naturalistic Situations Using a Spectrophotometric Assay
Source: MDPI journal article supplement (doi:10.3390/biology10030227), 2021-03-16

**Changes occurring on the activity of salivary alpha-amylase proteoforms in two naturalistic situations using a spectrophotometric assay.** María D. Contreras-Aguilar, Sandra V. Mateo, Fernando Tecles, Christophe Hirtz, Damián Escribano, Jose J. Cerón.

**Psychological stress model**

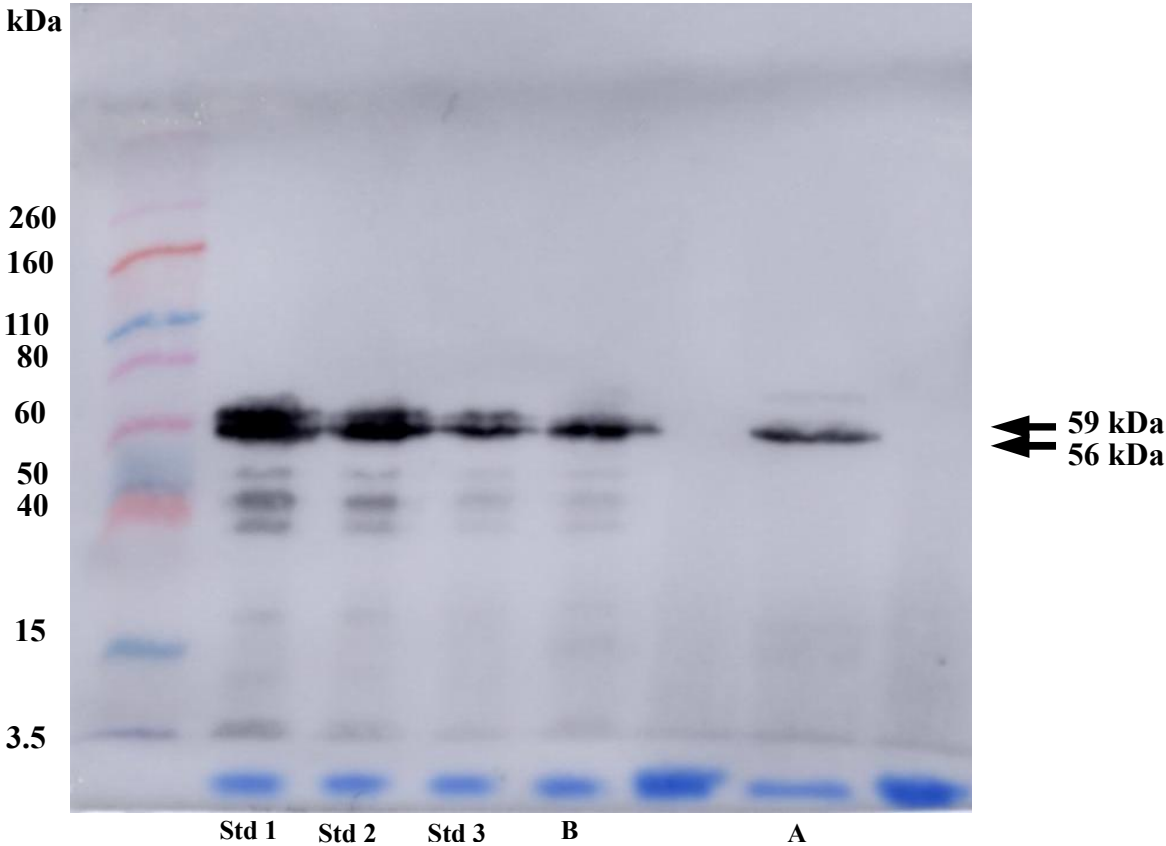

**Physical stress model**

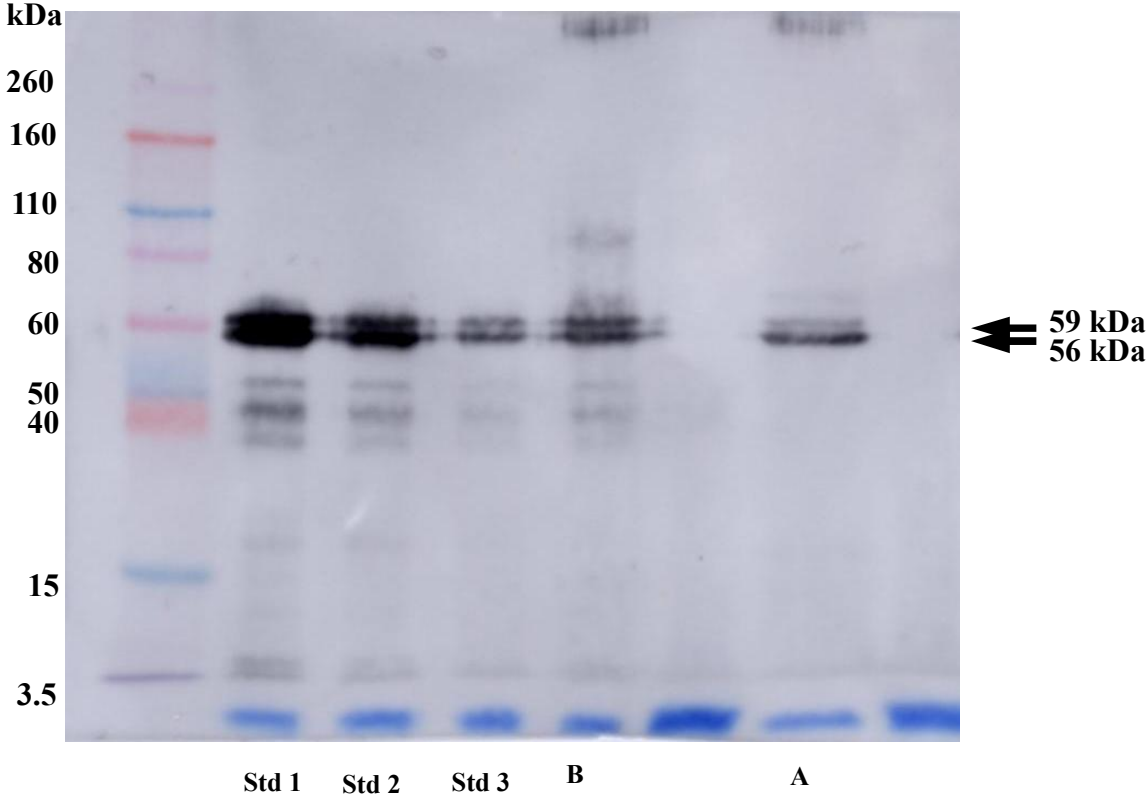

Supplement: s1 [file s1]
